# Supplementary material for: Ribosomal DNA harbors an evolutionarily conserved clock of biological aging
Source: HighWire-hosted journal article supplement (doi:10.1101/gr.241745.118), 2019-02-14
Supplement: Supplemental_Material.docx [file Supplemental_Material.docx]

Meng Wang and Bernardo Lemos. 2019. Ribosomal DNA harbors

an evolutionarily conserved clock of biological aging. *Genome Research.*

**Supplementary Figures**

**Supplemental Fig. 1.** **CpG density along human (*A*) and mouse (*B*) rDNA sequences.** The number of CpG sites was counted in a sliding window of 100 bp (from 49 bp upstream to 50 bp downstream the focal nucleotide) with a step of 1 bp.

**Supplemental Fig. 2. Quality control and reliability of mapping and age association**. (*A-C*) For the mice datasets, over 98% rDNA mapped reads can be specifically remapped onto rDNA or a homologous region on chromosome 17, but not other genomic regions. (*D, E*) For the human datasets, over 99% rDNA mapped reads can be specifically remapped onto rDNA or a homologous region on chromosome 21, but not other genomic regions. (*F*) For the canid dataset, on average 94.68% (ranging from 92.49% to 98.27%) rDNA mapped reads can be specifically remapped onto the rDNA. (*G*) The beta value of methylation level in a linear model (age being the response) is strongly correlated (ρ = 0.94, *P* < 2.2 × 10-16) with that in a linear mixed-effects model (confounding factors being random effects). (*H*) The ρage calculated using mice at all age stages is strongly correlated with that calculated using mice that are older than 10 months (Spearman’s ρ = 0.83, *P* < 2.2 × 10-16). (*I*) The correlation coefficients with age for CpGs from the sense and anti-sense strands of rDNA sequence are highly consistent (Spearman’s ρ = 0.75, *P* < 2.2 × 10-16).

**Supplemental Fig. 3. The distribution of ρage across rDNA CpGs with different sequencing depths.** CpGs were grouped into 15 equal bins based on their average depth across samples. The requirement of minimal depth >= 50 in >90% samples was used when calculating ρage. Under this cutoff the mean CpGs depth is >=152 (corresponding to bin 4 and higher). The more stringent requirement (minimal depth >= 50 in all samples of the Petkovich dataset) was used when building the models. It corresponds to bin 5 and higher. Under this requirement the mean CpGs depth is >=237.

**Supplemental Fig. 4. Validation of age-association rDNA CpGs using two independent datasets.** (*A*) For the Stubbs dataset which includes mice at 1, 14, 27 and 40 weeks old, ρage(Stubbs) was estimated as the correlation coefficients for CpGs with age. We observed a strong positive correlation (Spearman’s ρ = 0.35, *P* < 2.2 × 10-16) between ρage(Stubbs) and ρage(Petkovich). (*B*) For the Hahn dataset which includes mice at 5 (young) and 26 (old) month old, we also observed a significant positive correlation (Spearman’s ρ = 0.24, *P* = 6.38 × 10-9) between the old vs. young methylation differences with ρage(Petkovich).

**Supplemental Fig. 5. The distribution of mean ρage across genomic segments.** Here we calculated the mean ρage in sliding windows of size 15KB (A) and 3 MB (B). (*A*) Shows the distribution of mean ρage across 15KB windows. Windows with fewer than 10 informative CpGs were not considered. 2.6% (665/25445) had mean ρage larger than that the mean ρage of rDNA. (*B*) Similar as A, except 3MB windows were considered. No window showed larger mean ρage larger than that of rDNA. The number of CpGs in 3MB windows is comparable to the number of CpGs in the rDNA.

**Supplemental Fig. 6. The occurrence of CpGs in the 20,000 rDNAm models.** CpGs are ranked in a descending order based on their occurrence from a total of 786,095 events (considering 1 CpG occurrence in 1 model as an event). Among all the input CpGs, 90.2% (736/816) were selected at least once, with the 200 most frequent CpGs accounting for 95.3% of all the models. The 22 most frequent CpGs accounted for 43.2% of all events and were picked in over half of all models.

**Supplemental Fig. 7. The rDNAm clock is responsive to genetic and environmental interventions that modulate lifespan.** (*A*) B6D2F1 mice subject to calorie restriction (CR) have lowered rDNAm age than *ad libitum* (AL) ones (one-tailed *t*-test of rDNAm age, ***P* = 0.002). Seven 21-month-old CR mice were shown (versus five *ad libitum* (AL) 20-month-old mice, i.e., the ones with the closest ages). (*B*) Slow-aging growth hormone receptor knockout (GHR KO) mice have significantly lower rDNAm age than WT controls (**P* = 0.013). The numbers of CHRKO and CHRKO WT mice are 15 and 11, respectively, all being 6 -month-old. (*C*) Slow-aging snell dwarf (SD) mice did not show significant differences in rDNAm age relative to wild-type (WT) controls (n.s., *P* = 0.073), possibly suggesting distinct aging mechanisms. The numbers of SD and control mice are 10 and 12, respectively, all between 5 or 6 -month-old.

**Supplemental Fig. 8. rDNA methylation is sensitive to environmental and genetic interventions.** (*A-D*) Calorie restricted (CR) mice at different age stages are lower than *ad libitum* (AL) ones with the same or the closest ages. C57BL/6 mice were used. (*E, F*) Similar as (*A-D*), but with B6D2F1 mice used. (*G*) The slow-aging full-body growth hormone receptor knockout (GHR KO) mice have significantly lower methylation than their wild-type (WT) control. (*H*) The slow-aging snell dwarf (SD) mice do not have significantly lower methylation than the WT control. (*I, J*) The derived iPSC cell lines have significantly lower rDNA methylation levels than their relative kidney and lung fibroblasts. (*K*) The 26-month-old CR mice from the Hahn dataset have lower methylation that AL ones with the same age. (L) The 5-month-old CR mice from the Hahn dataset do not have lower methylation that AL ones with the same age. ****P* < 0.001, n.s. not significantly higher in WT/AL mice.

**Supplemental Fig. 9. The correlations between ρage and changes in rDNA methylation caused by interventions.** (*A-C*) C57BL/6 calorie restricted (CR) mice at different age stages were considered (versus *ad libitum* (AL) ones with the same or the closest ages). (*D, E*) Same as (*A-C*), but with B6D2F1 mice considered. (*F, G*) Two slow aging mice models [full-body growth hormone receptor knockout (GHR KO) and snell dwarf (SD)] were considered. (*H, I*) The CR mice from the Hahn dataset were consider (versus AL ones with the same age).

**Supplemental Fig. 10. Performance of the best fitted rDNAm models across mouse and canids.** (*A*) The model trained in canid and tested in mouse. (*B*) The model trained in mice and tested in canid. Samples from individuals with identical age (mouse) or similar age (canid) were grouped. rDNAm ages were rescaled (details in Material and Methods).

**Supplemental Fig. 11. Evolutionary conservation of the rDNAm clock between mice and humans.** (*A*), The B-cell derived GM12878 cell has higher rDNAm age than the H1 hESC (~8.6 folds, sample size insufficient for statistical test). (*B*) The rDNAm age is strongly correlated with chronological age for the skin samples (Spearman’s ρ = 0.79, P = 0.0041), whereas the two H1 cell samples displayed lower rDNAm age than all the skin samples (the two dots displaying the age estimate of the H1 samples in the figure below are near perfectly on top of each other). In panels *A* and *B*, the rDNAm ages were rescaled with the H1 hESC sample with the smallest value set to 1. (*C*) The per site ρage in mice is significantly correlated with the per site methylation difference between GM12878 and H1 hESC (ρ = 0.46, *P* < 2.2 × 10-16); analysis across homologous human-mouse CpGs. (*D*) Same as (*C*), but with GM12878 and H1 lines replaced by the average methylation in skin samples of the old (74, 75 and 83 years old) and young (18, 23 and 25 years old) individuals, respectively (ρ = 0.38, *P* < 2.2 × 10-9). The significant positive correlation holds for all pairwise comparisons between old versus young individuals.
