# Supplementary material for: Ribosomal DNA harbors an evolutionarily conserved clock of biological aging
Source: HighWire-hosted journal article supplement (doi:10.1101/gr.241745.118), 2019-02-14
Supplement: Supplemental_Table_S1.xlsx [file Supplemental_Table_S1.xlsx]

## Sheet: Sheet1
Supplemental Table S1. The Bisulfite-Seq datasets used in this study.
1) The Petkovich dataset (SRP073930)
SRA_Experiment	SRA_Run	Strain_Condition	Age	Gender	Resubset	Title	Seq_Type
SRX1727000	SRR3440565	C57BL/6_NIA/BWH	0.67 months	Male	1	GSM2132712: 20D02; Mus musculus; Bisulfite-Seq	PE RRBS
SRX1727001	SRR3440566	C57BL/6_NIA/BWH	0.67 months	Male	2	GSM2132713: 20D03; Mus musculus; Bisulfite-Seq	PE RRBS
SRX1727002	SRR3440567	C57BL/6_NIA/BWH	0.67 months	Male	1	GSM2132714: 20D04; Mus musculus; Bisulfite-Seq	PE RRBS
SRX1727003	SRR3440568	C57BL/6_NIA/BWH	0.67 months	Male	2	GSM2132715: 20D05; Mus musculus; Bisulfite-Seq	PE RRBS
SRX1727004	SRR3440569	C57BL/6_NIA/BWH	0.67 months	Male	1	GSM2132716: 20D06; Mus musculus; Bisulfite-Seq	PE RRBS
SRX1727005	SRR3440570	C57BL/6_NIA/BWH	0.67 months	Male	2	GSM2132717: 20D07; Mus musculus; Bisulfite-Seq	PE RRBS
SRX1727006	SRR3440571	C57BL/6_NIA/BWH	1.17 months	Male	1	GSM2132718: 35D01; Mus musculus; Bisulfite-Seq	PE RRBS
SRX1727007	SRR3440572	C57BL/6_NIA/BWH	1.17 months	Male	2	GSM2132719: 35D02; Mus musculus; Bisulfite-Seq	PE RRBS
SRX1727008	SRR3440573	C57BL/6_NIA/BWH	1.17 months	Male	1	GSM2132720: 35D04; Mus musculus; Bisulfite-Seq	PE RRBS
SRX1727009	SRR3440574	C57BL/6_NIA/BWH	1.17 months	Male	2	GSM2132721: 35D05; Mus musculus; Bisulfite-Seq	PE RRBS
SRX1727010	SRR3440575	C57BL/6_NIA/BWH	1.17 months	Male	1	GSM2132722: 35D06; Mus musculus; Bisulfite-Seq	PE RRBS
SRX1727011	SRR3440576	C57BL/6_NIA/BWH	1.17 months	Male	2	GSM2132723: 35D07; Mus musculus; Bisulfite-Seq	PE RRBS
SRX1727012	SRR3440577,SRR3440578	C57BL/6 (Calorie Restricted)	10 months	Male	n/a	GSM2132724: B6_CR1001; Mus musculus; Bisulfite-Seq	PE RRBS
SRX1727013	SRR3440579	C57BL/6 (Calorie Restricted)	10 months	Male	n/a	GSM2132725: B6_CR1002; Mus musculus; Bisulfite-Seq	PE RRBS
SRX1727014	SRR3440580,SRR3440581	C57BL/6 (Calorie Restricted)	10 months	Male	n/a	GSM2132726: B6_CR1003; Mus musculus; Bisulfite-Seq	PE RRBS
SRX1727015	SRR3440582	C57BL/6 (Calorie Restricted)	10 months	Male	n/a	GSM2132727: B6_CR1004; Mus musculus; Bisulfite-Seq	PE RRBS
SRX1727016	SRR3440583,SRR3440584	C57BL/6 (Calorie Restricted)	10 months	Male	n/a	GSM2132728: B6_CR1005; Mus musculus; Bisulfite-Seq	PE RRBS
SRX1727017	SRR3440585,SRR3440586	C57BL/6 (Calorie Restricted)	18 months	Male	n/a	GSM2132729: B6_CR1801; Mus musculus; Bisulfite-Seq	PE RRBS
SRX1727018	SRR3440587	C57BL/6 (Calorie Restricted)	18 months	Male	n/a	GSM2132730: B6_CR1802; Mus musculus; Bisulfite-Seq	PE RRBS
SRX1727019	SRR3440588,SRR3440589	C57BL/6 (Calorie Restricted)	18 months	Male	n/a	GSM2132731: B6_CR1803; Mus musculus; Bisulfite-Seq	PE RRBS
SRX1727020	SRR3440590	C57BL/6 (Calorie Restricted)	18 months	Male	n/a	GSM2132732: B6_CR1804; Mus musculus; Bisulfite-Seq	PE RRBS
SRX1727021	SRR3440591,SRR3440592	C57BL/6 (Calorie Restricted)	18 months	Male	n/a	GSM2132733: B6_CR1805; Mus musculus; Bisulfite-Seq	PE RRBS
SRX1727022	SRR3440593	C57BL/6 (Calorie Restricted)	23 months	Male	n/a	GSM2132734: B6_CR2301; Mus musculus; Bisulfite-Seq	PE RRBS
SRX1727023	SRR3440594,SRR3440595	C57BL/6 (Calorie Restricted)	23 months	Male	n/a	GSM2132735: B6_CR2302; Mus musculus; Bisulfite-Seq	PE RRBS
SRX1727024	SRR3440596	C57BL/6 (Calorie Restricted)	23 months	Male	n/a	GSM2132736: B6_CR2303; Mus musculus; Bisulfite-Seq	PE RRBS
SRX1727025	SRR3440597	C57BL/6 (Calorie Restricted)	23 months	Male	n/a	GSM2132737: B6_CR2304; Mus musculus; Bisulfite-Seq	PE RRBS
SRX1727026	SRR3440598	C57BL/6 (Calorie Restricted)	23 months	Male	n/a	GSM2132738: B6_CR2305; Mus musculus; Bisulfite-Seq	PE RRBS
SRX1727027	SRR3440599	C57BL/6 (Calorie Restricted)	27 months	Male	n/a	GSM2132739: B6_CR2701; Mus musculus; Bisulfite-Seq	PE RRBS
SRX1727028	SRR3440600,SRR3440601	C57BL/6 (Calorie Restricted)	27 months	Male	n/a	GSM2132740: B6_CR2702; Mus musculus; Bisulfite-Seq	PE RRBS
SRX1727029	SRR3440602,SRR3440603	C57BL/6 (Calorie Restricted)	27 months	Male	n/a	GSM2132741: B6_CR2703; Mus musculus; Bisulfite-Seq	PE RRBS
SRX1727030	SRR3440604	C57BL/6 (Calorie Restricted)	27 months	Male	n/a	GSM2132742: B6_CR2704; Mus musculus; Bisulfite-Seq	PE RRBS
SRX1727031	SRR3440605,SRR3440606	C57BL/6 (Calorie Restricted)	27 months	Male	n/a	GSM2132743: B6_CR2705; Mus musculus; Bisulfite-Seq	PE RRBS
SRX1727032	SRR3440607,SRR3440608	B6D2F1	20 months	Male	n/a	GSM2132744: B6D2F1_2001; Mus musculus; Bisulfite-Seq	PE RRBS
SRX1727033	SRR3440609,SRR3440610	B6D2F1	20 months	Male	n/a	GSM2132745: B6D2F1_2002; Mus musculus; Bisulfite-Seq	PE RRBS
SRX1727034	SRR3440611	B6D2F1	20 months	Male	n/a	GSM2132746: B6D2F1_2003; Mus musculus; Bisulfite-Seq	PE RRBS
SRX1727035	SRR3440612	B6D2F1	20 months	Male	n/a	GSM2132747: B6D2F1_2004; Mus musculus; Bisulfite-Seq	PE RRBS
SRX1727036	SRR3440613,SRR3440614	B6D2F1	20 months	Male	n/a	GSM2132748: B6D2F1_2005; Mus musculus; Bisulfite-Seq	PE RRBS
SRX1727037	SRR3440615	B6D2F1	27 months	Male	n/a	GSM2132749: B6D2F1_2701; Mus musculus; Bisulfite-Seq	PE RRBS
SRX1727038	SRR3440616	B6D2F1	27 months	Male	n/a	GSM2132750: B6D2F1_2702; Mus musculus; Bisulfite-Seq	PE RRBS
SRX1727039	SRR3440617,SRR3440618	B6D2F1	27 months	Male	n/a	GSM2132751: B6D2F1_2703; Mus musculus; Bisulfite-Seq	PE RRBS
SRX1727040	SRR3440619	B6D2F1	27 months	Male	n/a	GSM2132752: B6D2F1_2704; Mus musculus; Bisulfite-Seq	PE RRBS
SRX1727041	SRR3440620,SRR3440621	B6D2F1	27 months	Male	n/a	GSM2132753: B6D2F1_2705; Mus musculus; Bisulfite-Seq	PE RRBS
SRX1727042	SRR3440622,SRR3440623	B6D2F1(Calorie Restricted)	21 months	Male	n/a	GSM2132754: B6D2F1_CR2101; Mus musculus; Bisulfite-Seq	PE RRBS
SRX1727043	SRR3440624	B6D2F1(Calorie Restricted)	21 months	Male	n/a	GSM2132755: B6D2F1_CR2102; Mus musculus; Bisulfite-Seq	PE RRBS
SRX1727044	SRR3440625,SRR3440626	B6D2F1(Calorie Restricted)	21 months	Male	n/a	GSM2132756: B6D2F1_CR2103; Mus musculus; Bisulfite-Seq	PE RRBS
SRX1727045	SRR3440627	B6D2F1(Calorie Restricted)	21 months	Male	n/a	GSM2132757: B6D2F1_CR2104; Mus musculus; Bisulfite-Seq	PE RRBS
SRX1727046	SRR3440628	B6D2F1(Calorie Restricted)	21 months	Male	n/a	GSM2132758: B6D2F1_CR2105; Mus musculus; Bisulfite-Seq	PE RRBS
SRX1727047	SRR3440629	B6D2F1(Calorie Restricted)	21 months	Male	n/a	GSM2132759: b6d2f1_CR2106; Mus musculus; Bisulfite-Seq	PE RRBS
SRX1727048	SRR3440630,SRR3440631	B6D2F1(Calorie Restricted)	21 months	Male	n/a	GSM2132760: b6d2f1_CR2107; Mus musculus; Bisulfite-Seq	PE RRBS
SRX1727049	SRR3440632,SRR3440633	B6D2F1(Calorie Restricted)	27 months	Male	n/a	GSM2132761: B6D2F1_CR2701; Mus musculus; Bisulfite-Seq	PE RRBS
SRX1727050	SRR3440634	B6D2F1(Calorie Restricted)	27 months	Male	n/a	GSM2132762: B6D2F1_CR2702; Mus musculus; Bisulfite-Seq	PE RRBS
SRX1727051	SRR3440635,SRR3440636	B6D2F1(Calorie Restricted)	27 months	Male	n/a	GSM2132763: B6D2F1_CR2703; Mus musculus; Bisulfite-Seq	PE RRBS
SRX1727052	SRR3440637,SRR3440638	B6D2F1(Calorie Restricted)	27 months	Male	n/a	GSM2132764: B6D2F1_CR2704; Mus musculus; Bisulfite-Seq	PE RRBS
SRX1727053	SRR3440639	B6D2F1(Calorie Restricted)	27 months	Male	n/a	GSM2132765: B6D2F1_CR2705; Mus musculus; Bisulfite-Seq	PE RRBS
SRX1727054	SRR3440640,SRR3440641	Snell Dwarf Control	6 months	Female	n/a	GSM2132766: DW1; Mus musculus; Bisulfite-Seq	PE RRBS
SRX1727055	SRR3440642	Snell Dwarf Control	6 months	Female	n/a	GSM2132767: DW11; Mus musculus; Bisulfite-Seq	PE RRBS
SRX1727056	SRR3440643	Snell Dwarf	6 months	Female	n/a	GSM2132768: DW12; Mus musculus; Bisulfite-Seq	PE RRBS
SRX1727057	SRR3440644	Snell Dwarf Control	6 months	Female	n/a	GSM2132769: DW13; Mus musculus; Bisulfite-Seq	PE RRBS
SRX1727058	SRR3440645	Snell Dwarf	6 months	Female	n/a	GSM2132770: DW2; Mus musculus; Bisulfite-Seq	PE RRBS
SRX1727059	SRR3440646	Snell Dwarf Control	6 months	Male	n/a	GSM2132771: DW23; Mus musculus; Bisulfite-Seq	PE RRBS
SRX1727060	SRR3440647	Snell Dwarf	6 months	Male	n/a	GSM2132772: DW24; Mus musculus; Bisulfite-Seq	PE RRBS
SRX1727061	SRR3440648	Snell Dwarf Control	6 months	Male	n/a	GSM2132773: DW25; Mus musculus; Bisulfite-Seq	PE RRBS
SRX1727062	SRR3440649	Snell Dwarf Control	6 months	Male	n/a	GSM2132774: DW27; Mus musculus; Bisulfite-Seq	PE RRBS
SRX1727063	SRR3440650	Snell Dwarf	6 months	Male	n/a	GSM2132775: DW28; Mus musculus; Bisulfite-Seq	PE RRBS
SRX1727064	SRR3440651	Snell Dwarf Control	6 months	Male	n/a	GSM2132776: DW3; Mus musculus; Bisulfite-Seq	PE RRBS
SRX1727065	SRR3440652	Snell Dwarf	6 months	Male	n/a	GSM2132777: DW30; Mus musculus; Bisulfite-Seq	PE RRBS
SRX1727066	SRR3440653	Snell Dwarf Control	5 months	Male	n/a	GSM2132778: DW31; Mus musculus; Bisulfite-Seq	PE RRBS
SRX1727067	SRR3440654,SRR3440655	Snell Dwarf	5 months	Male	n/a	GSM2132779: DW32; Mus musculus; Bisulfite-Seq	PE RRBS
SRX1727068	SRR3440656	Snell Dwarf Control	5 months	Male	n/a	GSM2132780: DW33; Mus musculus; Bisulfite-Seq	PE RRBS
SRX1727069	SRR3440657	Snell Dwarf	5 months	Male	n/a	GSM2132781: DW34; Mus musculus; Bisulfite-Seq	PE RRBS
SRX1727070	SRR3440658	Snell Dwarf	6 months	Male	n/a	GSM2132782: DW4; Mus musculus; Bisulfite-Seq	PE RRBS
SRX1727071	SRR3440659	Snell Dwarf Control	6 months	Female	n/a	GSM2132783: DW5; Mus musculus; Bisulfite-Seq	PE RRBS
SRX1727072	SRR3440660	Snell Dwarf	6 months	Female	n/a	GSM2132784: DW6; Mus musculus; Bisulfite-Seq	PE RRBS
SRX1727073	SRR3440661	Snell Dwarf Control	6 months	Female	n/a	GSM2132785: DW7; Mus musculus; Bisulfite-Seq	PE RRBS
SRX1727074	SRR3440662	Snell Dwarf	6 months	Female	n/a	GSM2132786: DW8; Mus musculus; Bisulfite-Seq	PE RRBS
SRX1727075	SRR3440663	Snell Dwarf Control	6 months	Male	n/a	GSM2132787: DW9; Mus musculus; Bisulfite-Seq	PE RRBS
SRX1727076	SRR3440664	GHRKO WT	6 months	Female	n/a	GSM2132788: GX2455; Mus musculus; Bisulfite-Seq	PE RRBS
SRX1727077	SRR3440665	GHRKO	6 months	Female	n/a	GSM2132789: GX2464; Mus musculus; Bisulfite-Seq	PE RRBS
SRX1727078	SRR3440666	GHRKO WT	6 months	Female	n/a	GSM2132790: GX2465; Mus musculus; Bisulfite-Seq	PE RRBS
SRX1727079	SRR3440667	GHRKO	6 months	Female	n/a	GSM2132791: GX2466; Mus musculus; Bisulfite-Seq	PE RRBS
SRX1727080	SRR3440668	GHRKO	6 months	Female	n/a	GSM2132792: GX2467; Mus musculus; Bisulfite-Seq	PE RRBS
SRX1727081	SRR3440669	GHRKO	6 months	Male	n/a	GSM2132793: GX2468; Mus musculus; Bisulfite-Seq	PE RRBS
SRX1727082	SRR3440670	GHRKO	6 months	Male	n/a	GSM2132794: GX2470; Mus musculus; Bisulfite-Seq	PE RRBS
SRX1727083	SRR3440671	GHRKO	6 months	Male	n/a	GSM2132795: GX2471; Mus musculus; Bisulfite-Seq	PE RRBS
SRX1727084	SRR3440672	GHRKO WT	6 months	Male	n/a	GSM2132796: GX2472; Mus musculus; Bisulfite-Seq	PE RRBS
SRX1727085	SRR3440673	GHRKO	6 months	Female	n/a	GSM2132797: GX2474; Mus musculus; Bisulfite-Seq	PE RRBS
SRX1727086	SRR3440674	GHRKO WT	6 months	Male	n/a	GSM2132798: GX2479; Mus musculus; Bisulfite-Seq	PE RRBS
SRX1727087	SRR3440675,SRR3440676	GHRKO WT	6 months	Female	n/a	GSM2132799: GX2481; Mus musculus; Bisulfite-Seq	PE RRBS
SRX1727088	SRR3440677	GHRKO	6 months	Female	n/a	GSM2132800: GX2483; Mus musculus; Bisulfite-Seq	PE RRBS
SRX1727089	SRR3440678	GHRKO	6 months	Male	n/a	GSM2132801: GX2517; Mus musculus; Bisulfite-Seq	PE RRBS
SRX1727090	SRR3440679	GHRKO	6 months	Male	n/a	GSM2132802: GX2518; Mus musculus; Bisulfite-Seq	PE RRBS
SRX1727091	SRR3440680	GHRKO WT	6 months	Male	n/a	GSM2132803: GX2519; Mus musculus; Bisulfite-Seq	PE RRBS
SRX1727092	SRR3440681	GHRKO	6 months	Male	n/a	GSM2132804: GX2521; Mus musculus; Bisulfite-Seq	PE RRBS
SRX1727093	SRR3440682	GHRKO WT	6 months	Male	n/a	GSM2132805: GX2522; Mus musculus; Bisulfite-Seq	PE RRBS
SRX1727094	SRR3440683	GHRKO	6 months	Male	n/a	GSM2132806: GX2582; Mus musculus; Bisulfite-Seq	PE RRBS
SRX1727095	SRR3440684	GHRKO WT	6 months	Male	n/a	GSM2132807: GX2584; Mus musculus; Bisulfite-Seq	PE RRBS
SRX1727096	SRR3440685,SRR3440686	GHRKO WT	6 months	Male	n/a	GSM2132808: GX2595; Mus musculus; Bisulfite-Seq	PE RRBS
SRX1727097	SRR3440687,SRR3440688	GHRKO	6 months	Male	n/a	GSM2132809: GX2596; Mus musculus; Bisulfite-Seq	PE RRBS
SRX1727098	SRR3440689	GHRKO WT	6 months	Male	n/a	GSM2132810: GX2623; Mus musculus; Bisulfite-Seq	PE RRBS
SRX1727099	SRR3440690	GHRKO	6 months	Male	n/a	GSM2132811: GX2627; Mus musculus; Bisulfite-Seq	PE RRBS
SRX1727100	SRR3440691,SRR3440692	GHRKO WT	6 months	Male	n/a	GSM2132812: GX2638; Mus musculus; Bisulfite-Seq	PE RRBS
SRX1727101	SRR3440693	GHRKO	6 months	Female	n/a	GSM2132813: GX2642; Mus musculus; Bisulfite-Seq	PE RRBS
SRX1727102	SRR3440694,SRR3440695	Kidney Fibroblasts, C57BL/6	2.5 months	Male	n/a	GSM2132814: K1; Mus musculus; Bisulfite-Seq	PE RRBS
SRX1727103	SRR3440696,SRR3440697	Kidney Fibroblasts, C57BL/6	2.5 months	Male	n/a	GSM2132815: K2; Mus musculus; Bisulfite-Seq	PE RRBS
SRX1727104	SRR3440698,SRR3440699	Kidney Fibroblasts, C57BL/6	2.5 months	Male	n/a	GSM2132816: K3; Mus musculus; Bisulfite-Seq	PE RRBS
SRX1727105	SRR3440700,SRR3440701	Lung Fibroblasts, C57BL/6	2.5 months	Male	n/a	GSM2132817: L1; Mus musculus; Bisulfite-Seq	PE RRBS
SRX1727106	SRR3440702,SRR3440703	Lung Fibroblasts, C57BL/6	2.5 months	Male	n/a	GSM2132818: L2; Mus musculus; Bisulfite-Seq	PE RRBS
SRX1727107	SRR3440704,SRR3440705	Lung Fibroblasts, C57BL/6	2.5 months	Male	n/a	GSM2132819: L3; Mus musculus; Bisulfite-Seq	PE RRBS
SRX1727108	SRR3440706	C57BL/6	3 months	Male	1	GSM2132820: M0301; Mus musculus; Bisulfite-Seq	PE RRBS
SRX1727109	SRR3440707	C57BL/6	3 months	Male	2	GSM2132821: M0302; Mus musculus; Bisulfite-Seq	PE RRBS
SRX1727110	SRR3440708	C57BL/6	3 months	Male	1	GSM2132822: M0303; Mus musculus; Bisulfite-Seq	PE RRBS
SRX1727111	SRR3440709	C57BL/6	3 months	Male	2	GSM2132823: M0304; Mus musculus; Bisulfite-Seq	PE RRBS
SRX1727112	SRR3440710	C57BL/6	3 months	Male	1	GSM2132824: M0305; Mus musculus; Bisulfite-Seq	PE RRBS
SRX1727113	SRR3440711	C57BL/6	3 months	Male	2	GSM2132825: M0306; Mus musculus; Bisulfite-Seq	PE RRBS
SRX1727114	SRR3440712	C57BL/6	3 months	Male	1	GSM2132826: M0308; Mus musculus; Bisulfite-Seq	PE RRBS
SRX1727115	SRR3440713,SRR3440714	C57BL/6	3 months	Male	2	GSM2132827: M0309; Mus musculus; Bisulfite-Seq	PE RRBS
SRX1727116	SRR3440715	C57BL/6	3 months	Male	1	GSM2132828: M0310; Mus musculus; Bisulfite-Seq	PE RRBS
SRX1727117	SRR3440716,SRR3440717	C57BL/6	4 months	Male	2	GSM2132829: M0401; Mus musculus; Bisulfite-Seq	PE RRBS
SRX1727118	SRR3440718,SRR3440719	C57BL/6	4 months	Male	1	GSM2132830: M0402; Mus musculus; Bisulfite-Seq	PE RRBS
SRX1727119	SRR3440720	C57BL/6	4 months	Male	2	GSM2132831: M0403; Mus musculus; Bisulfite-Seq	PE RRBS
SRX1727120	SRR3440721,SRR3440722	C57BL/6	4 months	Male	1	GSM2132832: M0404; Mus musculus; Bisulfite-Seq	PE RRBS
SRX1727121	SRR3440723	C57BL/6	4 months	Male	2	GSM2132833: M0405; Mus musculus; Bisulfite-Seq	PE RRBS
SRX1727122	SRR3440724,SRR3440725	C57BL/6	4 months	Male	1	GSM2132834: M0406; Mus musculus; Bisulfite-Seq	PE RRBS
SRX1727123	SRR3440726	C57BL/6	4 months	Male	2	GSM2132835: M0407; Mus musculus; Bisulfite-Seq	PE RRBS
SRX1727124	SRR3440727	C57BL/6	4 months	Male	1	GSM2132836: M0409; Mus musculus; Bisulfite-Seq	PE RRBS
SRX1727125	SRR3440728,SRR3440729	C57BL/6	4 months	Male	2	GSM2132837: M0410; Mus musculus; Bisulfite-Seq	PE RRBS
SRX1727126	SRR3440730	C57BL/6	6 months	Male	1	GSM2132838: M0601; Mus musculus; Bisulfite-Seq	PE RRBS
SRX1727127	SRR3440731,SRR3440732	C57BL/6	6 months	Male	2	GSM2132839: M0603; Mus musculus; Bisulfite-Seq	PE RRBS
SRX1727128	SRR3440733	C57BL/6	6 months	Male	1	GSM2132840: M0604; Mus musculus; Bisulfite-Seq	PE RRBS
SRX1727129	SRR3440734	C57BL/6	6 months	Male	2	GSM2132841: M0605; Mus musculus; Bisulfite-Seq	PE RRBS
SRX1727130	SRR3440735	C57BL/6	6 months	Male	1	GSM2132842: M0606; Mus musculus; Bisulfite-Seq	PE RRBS
SRX1727131	SRR3440736	C57BL/6	6 months	Male	2	GSM2132843: M0607; Mus musculus; Bisulfite-Seq	PE RRBS
SRX1727132	SRR3440737	C57BL/6	6 months	Male	1	GSM2132844: M0608; Mus musculus; Bisulfite-Seq	PE RRBS
SRX1727133	SRR3440738	C57BL/6	6 months	Male	2	GSM2132845: M0609; Mus musculus; Bisulfite-Seq	PE RRBS
SRX1727134	SRR3440739	C57BL/6	6 months	Male	1	GSM2132846: M0610; Mus musculus; Bisulfite-Seq	PE RRBS
SRX1727135	SRR3440740,SRR3440741	C57BL/6	8 months	Male	2	GSM2132847: M0801; Mus musculus; Bisulfite-Seq	PE RRBS
SRX1727136	SRR3440742,SRR3440743	C57BL/6	8 months	Male	1	GSM2132848: M0802; Mus musculus; Bisulfite-Seq	PE RRBS
SRX1727137	SRR3440744,SRR3440745	C57BL/6	8 months	Male	2	GSM2132849: M0803; Mus musculus; Bisulfite-Seq	PE RRBS
SRX1727138	SRR3440746,SRR3440747	C57BL/6	8 months	Male	1	GSM2132850: M0804; Mus musculus; Bisulfite-Seq	PE RRBS
SRX1727139	SRR3440748,SRR3440749	C57BL/6	8 months	Male	2	GSM2132851: M0805; Mus musculus; Bisulfite-Seq	PE RRBS
SRX1727140	SRR3440750,SRR3440751	C57BL/6	8 months	Male	1	GSM2132852: M0806; Mus musculus; Bisulfite-Seq	PE RRBS
SRX1727141	SRR3440752,SRR3440753	C57BL/6	8 months	Male	2	GSM2132853: M0807; Mus musculus; Bisulfite-Seq	PE RRBS
SRX1727142	SRR3440754,SRR3440755	C57BL/6	8 months	Male	1	GSM2132854: M0808; Mus musculus; Bisulfite-Seq	PE RRBS
SRX1727143	SRR3440756,SRR3440757	C57BL/6	8 months	Male	2	GSM2132855: M0810; Mus musculus; Bisulfite-Seq	PE RRBS
SRX1727144	SRR3440758	C57BL/6	10 months	Male	1	GSM2132856: M10_7501; Mus musculus; Bisulfite-Seq	PE RRBS
SRX1727145	SRR3440759	C57BL/6	10 months	Male	2	GSM2132857: M10_7502; Mus musculus; Bisulfite-Seq	PE RRBS
SRX1727146	SRR3440760,SRR3440761	C57BL/6	10 months	Male	1	GSM2132858: M10_7504; Mus musculus; Bisulfite-Seq	PE RRBS
SRX1727147	SRR3440762	C57BL/6	10 months	Male	2	GSM2132859: M10_7505; Mus musculus; Bisulfite-Seq	PE RRBS
SRX1727148	SRR3440763	C57BL/6	10 months	Male	1	GSM2132860: M10_7506; Mus musculus; Bisulfite-Seq	PE RRBS
SRX1727149	SRR3440764	C57BL/6	10 months	Male	2	GSM2132861: M10_7507; Mus musculus; Bisulfite-Seq	PE RRBS
SRX1727150	SRR3440765	C57BL/6	10 months	Male	1	GSM2132862: M10_7508; Mus musculus; Bisulfite-Seq	PE RRBS
SRX1727151	SRR3440766	C57BL/6	10 months	Male	2	GSM2132863: M10_7509; Mus musculus; Bisulfite-Seq	PE RRBS
SRX1727152	SRR3440767	C57BL/6	10 months	Male	1	GSM2132864: M10_7510; Mus musculus; Bisulfite-Seq	PE RRBS
SRX1727153	SRR3440768	C57BL/6	12 months	Male	2	GSM2132865: M1201; Mus musculus; Bisulfite-Seq	PE RRBS
SRX1727154	SRR3440769	C57BL/6	12 months	Male	1	GSM2132866: M1202; Mus musculus; Bisulfite-Seq	PE RRBS
SRX1727155	SRR3440770,SRR3440771	C57BL/6	12 months	Male	2	GSM2132867: M1203; Mus musculus; Bisulfite-Seq	PE RRBS
SRX1727156	SRR3440772	C57BL/6	12 months	Male	1	GSM2132868: M1204; Mus musculus; Bisulfite-Seq	PE RRBS
SRX1727157	SRR3440773	C57BL/6	12 months	Male	2	GSM2132869: M1205; Mus musculus; Bisulfite-Seq	PE RRBS
SRX1727158	SRR3440774,SRR3440775	C57BL/6	12 months	Male	1	GSM2132870: M1206; Mus musculus; Bisulfite-Seq	PE RRBS
SRX1727159	SRR3440776,SRR3440777	C57BL/6	12 months	Male	2	GSM2132871: M1207; Mus musculus; Bisulfite-Seq	PE RRBS
SRX1727160	SRR3440778,SRR3440779	C57BL/6	12 months	Male	1	GSM2132872: M1208; Mus musculus; Bisulfite-Seq	PE RRBS
SRX1727161	SRR3440780	C57BL/6	12 months	Male	2	GSM2132873: M1209; Mus musculus; Bisulfite-Seq	PE RRBS
SRX1727162	SRR3440781	C57BL/6	12 months	Male	1	GSM2132874: M1210; Mus musculus; Bisulfite-Seq	PE RRBS
SRX1727163	SRR3440782,SRR3440783	C57BL/6	16 months	Male	2	GSM2132875: M1601; Mus musculus; Bisulfite-Seq	PE RRBS
SRX1727164	SRR3440784,SRR3440785	C57BL/6	16 months	Male	1	GSM2132876: M1602; Mus musculus; Bisulfite-Seq	PE RRBS
SRX1727165	SRR3440786,SRR3440787	C57BL/6	16 months	Male	2	GSM2132877: M1603; Mus musculus; Bisulfite-Seq	PE RRBS
SRX1727166	SRR3440788,SRR3440789	C57BL/6	16 months	Male	1	GSM2132878: M1605; Mus musculus; Bisulfite-Seq	PE RRBS
SRX1727167	SRR3440790	C57BL/6	16 months	Male	2	GSM2132879: M1606; Mus musculus; Bisulfite-Seq	PE RRBS
SRX1727168	SRR3440791,SRR3440792	C57BL/6	16 months	Male	1	GSM2132880: M1607; Mus musculus; Bisulfite-Seq	PE RRBS
SRX1727169	SRR3440793	C57BL/6	16 months	Male	2	GSM2132881: M1608; Mus musculus; Bisulfite-Seq	PE RRBS
SRX1727170	SRR3440794,SRR3440795	C57BL/6	16 months	Male	1	GSM2132882: M1609; Mus musculus; Bisulfite-Seq	PE RRBS
SRX1727171	SRR3440796,SRR3440797	C57BL/6	16 months	Male	2	GSM2132883: M1610; Mus musculus; Bisulfite-Seq	PE RRBS
SRX1727172	SRR3440798	C57BL/6	20 months	Male	1	GSM2132884: M2001; Mus musculus; Bisulfite-Seq	PE RRBS
SRX1727173	SRR3440799,SRR3440800	C57BL/6	20 months	Male	2	GSM2132885: M2003; Mus musculus; Bisulfite-Seq	PE RRBS
SRX1727174	SRR3440801,SRR3440802	C57BL/6	20 months	Male	1	GSM2132886: M2004; Mus musculus; Bisulfite-Seq	PE RRBS
SRX1727175	SRR3440803,SRR3440804	C57BL/6	20 months	Male	2	GSM2132887: M2005; Mus musculus; Bisulfite-Seq	PE RRBS
SRX1727176	SRR3440805,SRR3440806	C57BL/6	20 months	Male	1	GSM2132888: M2006; Mus musculus; Bisulfite-Seq	PE RRBS
SRX1727177	SRR3440807,SRR3440808	C57BL/6	20 months	Male	2	GSM2132889: M2007; Mus musculus; Bisulfite-Seq	PE RRBS
SRX1727178	SRR3440809,SRR3440810	C57BL/6	20 months	Male	1	GSM2132890: M2008; Mus musculus; Bisulfite-Seq	PE RRBS
SRX1727179	SRR3440811	C57BL/6	20 months	Male	2	GSM2132891: M2009; Mus musculus; Bisulfite-Seq	PE RRBS
SRX1727180	SRR3440812,SRR3440813	C57BL/6	20 months	Male	1	GSM2132892: M2010; Mus musculus; Bisulfite-Seq	PE RRBS
SRX1727181	SRR3440814,SRR3440815	C57BL/6	22 months	Male	2	GSM2132893: M2201; Mus musculus; Bisulfite-Seq	PE RRBS
SRX1727182	SRR3440816	C57BL/6	22 months	Male	1	GSM2132894: M2202; Mus musculus; Bisulfite-Seq	PE RRBS
SRX1727183	SRR3440817	C57BL/6	22 months	Male	2	GSM2132895: M2203; Mus musculus; Bisulfite-Seq	PE RRBS
SRX1727184	SRR3440818,SRR3440819	C57BL/6	22 months	Male	1	GSM2132896: M2204; Mus musculus; Bisulfite-Seq	PE RRBS
SRX1727185	SRR3440820,SRR3440821	C57BL/6	22 months	Male	2	GSM2132897: M2205; Mus musculus; Bisulfite-Seq	PE RRBS
SRX1727186	SRR3440822,SRR3440823	C57BL/6	22 months	Male	1	GSM2132898: M2206; Mus musculus; Bisulfite-Seq	PE RRBS
SRX1727187	SRR3440824,SRR3440825	C57BL/6	22 months	Male	2	GSM2132899: M2208; Mus musculus; Bisulfite-Seq	PE RRBS
SRX1727188	SRR3440826,SRR3440827	C57BL/6	22 months	Male	1	GSM2132900: M2209; Mus musculus; Bisulfite-Seq	PE RRBS
SRX1727189	SRR3440828,SRR3440829	C57BL/6	22 months	Male	2	GSM2132901: M2210; Mus musculus; Bisulfite-Seq	PE RRBS
SRX1727190	SRR3440830,SRR3440831	C57BL/6	24 months	Male	1	GSM2132902: M2401; Mus musculus; Bisulfite-Seq	PE RRBS
SRX1727191	SRR3440832	C57BL/6	24 months	Male	2	GSM2132903: M2402; Mus musculus; Bisulfite-Seq	PE RRBS
SRX1727192	SRR3440833,SRR3440834	C57BL/6	24 months	Male	1	GSM2132904: M2403; Mus musculus; Bisulfite-Seq	PE RRBS
SRX1727193	SRR3440835,SRR3440836	C57BL/6	24 months	Male	2	GSM2132905: M2404; Mus musculus; Bisulfite-Seq	PE RRBS
SRX1727194	SRR3440837,SRR3440838	C57BL/6	24 months	Male	1	GSM2132906: M2405; Mus musculus; Bisulfite-Seq	PE RRBS
SRX1727195	SRR3440839	C57BL/6	24 months	Male	2	GSM2132907: M2407; Mus musculus; Bisulfite-Seq	PE RRBS
SRX1727196	SRR3440840,SRR3440841	C57BL/6	24 months	Male	1	GSM2132908: M2408; Mus musculus; Bisulfite-Seq	PE RRBS
SRX1727197	SRR3440842,SRR3440843	C57BL/6	24 months	Male	2	GSM2132909: M2409; Mus musculus; Bisulfite-Seq	PE RRBS
SRX1727198	SRR3440844,SRR3440845	C57BL/6	24 months	Male	1	GSM2132910: M2411; Mus musculus; Bisulfite-Seq	PE RRBS
SRX1727199	SRR3440846	C57BL/6	26 months	Male	2	GSM2132911: M2601; Mus musculus; Bisulfite-Seq	PE RRBS
SRX1727200	SRR3440847	C57BL/6	26 months	Male	1	GSM2132912: M2602; Mus musculus; Bisulfite-Seq	PE RRBS
SRX1727201	SRR3440848,SRR3440849	C57BL/6	26 months	Male	2	GSM2132913: M2603; Mus musculus; Bisulfite-Seq	PE RRBS
SRX1727202	SRR3440850,SRR3440851	C57BL/6	26 months	Male	1	GSM2132914: M2604; Mus musculus; Bisulfite-Seq	PE RRBS
SRX1727203	SRR3440852	C57BL/6	26 months	Male	2	GSM2132915: M2605; Mus musculus; Bisulfite-Seq	PE RRBS
SRX1727204	SRR3440853,SRR3440854	C57BL/6	26 months	Male	1	GSM2132916: M2606; Mus musculus; Bisulfite-Seq	PE RRBS
SRX1727205	SRR3440855,SRR3440856	C57BL/6	26 months	Male	2	GSM2132917: M2607; Mus musculus; Bisulfite-Seq	PE RRBS
SRX1727206	SRR3440857,SRR3440858	C57BL/6	26 months	Male	1	GSM2132918: M2608; Mus musculus; Bisulfite-Seq	PE RRBS
SRX1727207	SRR3440859,SRR3440860	C57BL/6	26 months	Male	2	GSM2132919: M2609; Mus musculus; Bisulfite-Seq	PE RRBS
SRX1727208	SRR3440861,SRR3440862	C57BL/6	26 months	Male	1	GSM2132920: M2610; Mus musculus; Bisulfite-Seq	PE RRBS
SRX1727209	SRR3440863,SRR3440864	C57BL/6	28 months	Male	2	GSM2132921: M2801; Mus musculus; Bisulfite-Seq	PE RRBS
SRX1727210	SRR3440865,SRR3440866	C57BL/6	28 months	Male	1	GSM2132922: M2802; Mus musculus; Bisulfite-Seq	PE RRBS
SRX1727211	SRR3440867,SRR3440868	C57BL/6	28 months	Male	2	GSM2132923: M2804; Mus musculus; Bisulfite-Seq	PE RRBS
SRX1727212	SRR3440869	C57BL/6	28 months	Male	1	GSM2132924: M2805; Mus musculus; Bisulfite-Seq	PE RRBS
SRX1727213	SRR3440870,SRR3440871	C57BL/6	28 months	Male	2	GSM2132925: M2806; Mus musculus; Bisulfite-Seq	PE RRBS
SRX1727214	SRR3440872,SRR3440873	C57BL/6	28 months	Male	1	GSM2132926: M2807; Mus musculus; Bisulfite-Seq	PE RRBS
SRX1727215	SRR3440874,SRR3440875	C57BL/6	28 months	Male	2	GSM2132927: M2808; Mus musculus; Bisulfite-Seq	PE RRBS
SRX1727216	SRR3440876,SRR3440877	C57BL/6	28 months	Male	1	GSM2132928: M2809; Mus musculus; Bisulfite-Seq	PE RRBS
SRX1727217	SRR3440878	C57BL/6	28 months	Male	2	GSM2132929: M2810; Mus musculus; Bisulfite-Seq	PE RRBS
SRX1727218	SRR3440879,SRR3440880	C57BL/6	30 months	Male	1	GSM2132930: M3001; Mus musculus; Bisulfite-Seq	PE RRBS
SRX1727219	SRR3440881	C57BL/6	30 months	Male	2	GSM2132931: M3002; Mus musculus; Bisulfite-Seq	PE RRBS
SRX1727220	SRR3440882,SRR3440883	C57BL/6	30 months	Male	1	GSM2132932: M3003; Mus musculus; Bisulfite-Seq	PE RRBS
SRX1727221	SRR3440884,SRR3440885	C57BL/6	30 months	Male	2	GSM2132933: M3004; Mus musculus; Bisulfite-Seq	PE RRBS
SRX1727222	SRR3440886,SRR3440887	C57BL/6	30 months	Male	1	GSM2132934: M3005; Mus musculus; Bisulfite-Seq	PE RRBS
SRX1727223	SRR3440888,SRR3440889	C57BL/6	30 months	Male	2	GSM2132935: M3006; Mus musculus; Bisulfite-Seq	PE RRBS
SRX1727224	SRR3440890	C57BL/6	30 months	Male	1	GSM2132936: M3007; Mus musculus; Bisulfite-Seq	PE RRBS
SRX1727225	SRR3440891,SRR3440892	C57BL/6	30 months	Male	2	GSM2132937: M3009; Mus musculus; Bisulfite-Seq	PE RRBS
SRX1727226	SRR3440893	C57BL/6	30 months	Male	1	GSM2132938: M3010; Mus musculus; Bisulfite-Seq	PE RRBS
SRX1727227	SRR3440894,SRR3440895	C57BL/6	32 months	Male	2	GSM2132939: M3204; Mus musculus; Bisulfite-Seq	PE RRBS
SRX1727228	SRR3440896,SRR3440897	C57BL/6	32 months	Male	1	GSM2132940: M3205; Mus musculus; Bisulfite-Seq	PE RRBS
SRX1727229	SRR3440898,SRR3440899	C57BL/6	32 months	Male	2	GSM2132941: M3206; Mus musculus; Bisulfite-Seq	PE RRBS
SRX1727230	SRR3440900,SRR3440901	C57BL/6	32 months	Male	1	GSM2132942: M3207; Mus musculus; Bisulfite-Seq	PE RRBS
SRX1727231	SRR3440902,SRR3440903	C57BL/6	32 months	Male	2	GSM2132943: M3208; Mus musculus; Bisulfite-Seq	PE RRBS
SRX1727232	SRR3440904,SRR3440905	C57BL/6	32 months	Male	1	GSM2132944: M3209; Mus musculus; Bisulfite-Seq	PE RRBS
SRX1727233	SRR3440906	C57BL/6	32 months	Male	2	GSM2132945: M3210; Mus musculus; Bisulfite-Seq	PE RRBS
SRX1727234	SRR3440907,SRR3440908	C57BL/6	34 months	Male	1	GSM2132946: M3401; Mus musculus; Bisulfite-Seq	PE RRBS
SRX1727235	SRR3440909,SRR3440910	C57BL/6	34 months	Male	2	GSM2132947: M3402; Mus musculus; Bisulfite-Seq	PE RRBS
SRX1727236	SRR3440911	C57BL/6	34 months	Male	1	GSM2132948: M3403; Mus musculus; Bisulfite-Seq	PE RRBS
SRX1727237	SRR3440912,SRR3440913	C57BL/6	34 months	Male	2	GSM2132949: M3404; Mus musculus; Bisulfite-Seq	PE RRBS
SRX1727238	SRR3440914,SRR3440915	C57BL/6	34 months	Male	1	GSM2132950: M3405; Mus musculus; Bisulfite-Seq	PE RRBS
SRX1727239	SRR3440916	C57BL/6	34 months	Male	2	GSM2132951: M3406; Mus musculus; Bisulfite-Seq	PE RRBS
SRX1727240	SRR3440917,SRR3440918	C57BL/6	34 months	Male	1	GSM2132952: M3408; Mus musculus; Bisulfite-Seq	PE RRBS
SRX1727241	SRR3440919	C57BL/6	34 months	Male	2	GSM2132953: M3409; Mus musculus; Bisulfite-Seq	PE RRBS
SRX1727242	SRR3440920,SRR3440921	C57BL/6	34 months	Male	1	GSM2132954: M3410; Mus musculus; Bisulfite-Seq	PE RRBS
SRX1727243	SRR3440922,SRR3440923	C57BL/6	35 months	Male	2	GSM2132955: M3501; Mus musculus; Bisulfite-Seq	PE RRBS
SRX1727244	SRR3440924,SRR3440925	C57BL/6	35 months	Male	1	GSM2132956: M3501R; Mus musculus; Bisulfite-Seq	PE RRBS
SRX1727245	SRR3440926,SRR3440927	C57BL/6	35 months	Male	2	GSM2132957: M3502; Mus musculus; Bisulfite-Seq	PE RRBS
SRX1727246	SRR3440928,SRR3440929	C57BL/6	35 months	Male	1	GSM2132958: M3502R; Mus musculus; Bisulfite-Seq	PE RRBS
SRX1727247	SRR3440930,SRR3440931	C57BL/6	35 months	Male	2	GSM2132959: M3503; Mus musculus; Bisulfite-Seq	PE RRBS
SRX1727248	SRR3440932	C57BL/6	35 months	Male	1	GSM2132960: M3503R; Mus musculus; Bisulfite-Seq	PE RRBS
SRX1727249	SRR3440933,SRR3440934	Derived from K1	2.5 months	Male	n/a	GSM2132961: MIPSK1; Mus musculus; Bisulfite-Seq	PE RRBS
SRX1727250	SRR3440935,SRR3440936	Derived from K2	2.5 months	Male	n/a	GSM2132962: MIPSK2; Mus musculus; Bisulfite-Seq	PE RRBS
SRX1727251	SRR3440937,SRR3440938	Derived from K3	2.5 months	Male	n/a	GSM2132963: MIPSK3; Mus musculus; Bisulfite-Seq	PE RRBS
SRX1727252	SRR3440939,SRR3440940	Derived from L1	2.5 months	Male	n/a	GSM2132964: MIPSL1; Mus musculus; Bisulfite-Seq	PE RRBS
SRX1727253	SRR3440941,SRR3440942	Derived from L2	2.5 months	Male	n/a	GSM2132965: MIPSL2; Mus musculus; Bisulfite-Seq	PE RRBS
SRX1727254	SRR3440943,SRR3440944	Derived from L3	2.5 months	Male	n/a	GSM2132966: MIPSL3; Mus musculus; Bisulfite-Seq	PE RRBS
2) The Stubbs dataset
SRA_Experiment	SRA_Run	Strain	Age	Gender	Tissue	GEO accession	Seq_Type
SRX2511233	SRR5195631	C57BL/6 BABR	41wk	male	Liver	GSM2465625	PE RRBS
SRX2511234	SRR5195632	C57BL/6 BABR	41wk	male	Lung	GSM2465626	PE RRBS
SRX2511235	SRR5195633	C57BL/6 BABR	41wk	male	Cortex	GSM2465627	PE RRBS
SRX2511236	SRR5195634	C57BL/6 BABR	41wk	male	Heart	GSM2465628	PE RRBS
SRX2511237	SRR5195635	C57BL/6 BABR	41wk	male	Liver	GSM2465629	PE RRBS
SRX2511238	SRR5195636	C57BL/6 BABR	41wk	male	Lung	GSM2465630	PE RRBS
SRX2511239	SRR5195637	C57BL/6 BABR	27wk	male	Cortex	GSM2465631	PE RRBS
SRX2511240	SRR5195638	C57BL/6 BABR	27wk	male	Heart	GSM2465632	PE RRBS
SRX2511241	SRR5195639	C57BL/6 BABR	27wk	male	Liver	GSM2465633	PE RRBS
SRX2511242	SRR5195640	C57BL/6 BABR	27wk	male	Lung	GSM2465634	PE RRBS
SRX2511243	SRR5195641	C57BL/6 BABR	27wk	male	Cortex	GSM2465635	PE RRBS
SRX2511244	SRR5195642	C57BL/6 BABR	27wk	male	Heart	GSM2465636	PE RRBS
SRX2511245	SRR5195643	C57BL/6 BABR	27wk	male	Liver	GSM2465637	PE RRBS
SRX2511246	SRR5195644	C57BL/6 BABR	27wk	male	Lung	GSM2465638	PE RRBS
SRX2511247	SRR5195645	C57BL/6 BABR	27wk	male	Cortex	GSM2465639	PE RRBS
SRX2511248	SRR5195646	C57BL/6 BABR	27wk	male	Heart	GSM2465640	PE RRBS
SRX2511249	SRR5195647	C57BL/6 BABR	27wk	male	Liver	GSM2465641	PE RRBS
SRX2511250	SRR5195648	C57BL/6 BABR	27wk	male	Lung	GSM2465642	PE RRBS
SRX2511223	SRR5195621	C57BL/6 BABR	41wk	male	Cortex	GSM2465615	PE RRBS
SRX2511224	SRR5195622	C57BL/6 BABR	41wk	male	Heart	GSM2465616	PE RRBS
SRX2511225	SRR5195623	C57BL/6 BABR	41wk	male	Liver	GSM2465617	PE RRBS
SRX2511226	SRR5195624	C57BL/6 BABR	41wk	male	Lung	GSM2465618	PE RRBS
SRX2511227	SRR5195625	C57BL/6 BABR	41wk	male	Cortex	GSM2465619	PE RRBS
SRX2511228	SRR5195626	C57BL/6 BABR	41wk	male	Heart	GSM2465620	PE RRBS
SRX2511229	SRR5195627	C57BL/6 BABR	41wk	male	Liver	GSM2465621	PE RRBS
SRX2511230	SRR5195628	C57BL/6 BABR	41wk	male	Lung	GSM2465622	PE RRBS
SRX2511231	SRR5195629	C57BL/6 BABR	41wk	male	Cortex	GSM2465623	PE RRBS
SRX2511232	SRR5195630	C57BL/6 BABR	41wk	male	Heart	GSM2465624	PE RRBS
SRX2511251	SRR5195649	C57BL/6 BABR	27wk	male	Cortex	GSM2465643	PE RRBS
SRX2511252	SRR5195650	C57BL/6 BABR	27wk	male	Heart	GSM2465644	PE RRBS
SRX2511253	SRR5195651	C57BL/6 BABR	27wk	male	Liver	GSM2465645	PE RRBS
SRX2511254	SRR5195652	C57BL/6 BABR	27wk	male	Lung	GSM2465646	PE RRBS
SRX2511255	SRR5195653	C57BL/6 BABR	1wk	male	Cortex	GSM2465647	PE RRBS
SRX2511256	SRR5195654	C57BL/6 BABR	1wk	male	Heart	GSM2465648	PE RRBS
SRX2511257	SRR5195655	C57BL/6 BABR	1wk	male	Liver	GSM2465649	PE RRBS
SRX2511258	SRR5195656	C57BL/6 BABR	1wk	male	Lung	GSM2465650	PE RRBS
SRX2511259	SRR5195657	C57BL/6 BABR	1wk	male	Cortex	GSM2465651	PE RRBS
SRX2511260	SRR5195658	C57BL/6 BABR	1wk	male	Liver	GSM2465652	PE RRBS
SRX2511261	SRR5195659	C57BL/6 BABR	1wk	male	Lung	GSM2465653	PE RRBS
SRX2511262	SRR5195660	C57BL/6 BABR	1wk	male	Cortex	GSM2465654	PE RRBS
SRX2511263	SRR5195661	C57BL/6 BABR	1wk	male	Heart	GSM2465655	PE RRBS
SRX2511264	SRR5195662	C57BL/6 BABR	1wk	male	Lung	GSM2465656	PE RRBS
SRX2511265	SRR5195663	C57BL/6 BABR	14wk	male	Cortex	GSM2465657	PE RRBS
SRX2511266	SRR5195664	C57BL/6 BABR	14wk	male	Heart	GSM2465658	PE RRBS
SRX2511267	SRR5195665	C57BL/6 BABR	14wk	male	Liver	GSM2465659	PE RRBS
SRX2511268	SRR5195666	C57BL/6 BABR	14wk	male	Lung	GSM2465660	PE RRBS
SRX2511269	SRR5195667	C57BL/6 BABR	14wk	male	Cortex	GSM2465661	PE RRBS
SRX2511270	SRR5195668	C57BL/6 BABR	14wk	male	Heart	GSM2465662	PE RRBS
SRX2511271	SRR5195669	C57BL/6 BABR	14wk	male	Liver	GSM2465663	PE RRBS
SRX2511272	SRR5195670	C57BL/6 BABR	14wk	male	Lung	GSM2465664	PE RRBS
SRX2511273	SRR5195671	C57BL/6 BABR	1wk	male	Cortex	GSM2465665	PE RRBS
SRX2511274	SRR5195672	C57BL/6 BABR	1wk	male	Heart	GSM2465666	PE RRBS
SRX2511275	SRR5195673	C57BL/6 BABR	1wk	male	Liver	GSM2465667	PE RRBS
SRX2511276	SRR5195674	C57BL/6 BABR	1wk	male	Lung	GSM2465668	PE RRBS
SRX2511277	SRR5195675	C57BL/6 BABR	27wk	male	Cortex	GSM2465669	PE RRBS
SRX2511278	SRR5195676	C57BL/6 BABR	27wk	male	Heart	GSM2465670	PE RRBS
SRX2511279	SRR5195677	C57BL/6 BABR	27wk	male	Liver	GSM2465671	PE RRBS
SRX2511280	SRR5195678	C57BL/6 BABR	27wk	male	Lung	GSM2465672	PE RRBS
SRX2511281	SRR5195679	C57BL/6 BABR	14wk	male	Cortex	GSM2465673	PE RRBS
SRX2511282	SRR5195680	C57BL/6 BABR	14wk	male	Heart	GSM2465674	PE RRBS
SRX2511283	SRR5195681	C57BL/6 BABR	14wk	male	Liver	GSM2465675	PE RRBS
SRX2511284	SRR5195682	C57BL/6 BABR	14wk	male	Lung	GSM2465676	PE RRBS
3) The Hahn dataset
SRA_Experiment	SRA_Run	Strain	Age	Gender	Tissue	Condition	GEO accession	Seq_Type
SRX2431051	SRR5115679	C3B6F1	5 months	female	liver	control-fed (AL)	GSM2430564	PE WGBS
SRX2431052	SRR5115680	C3B6F1	5 months	female	liver	control-fed (AL)	GSM2430565	PE WGBS
SRX2431053	SRR5115681	C3B6F1	5 months	female	liver	control-fed (AL)	GSM2430566	PE WGBS
SRX2431054	SRR5115682	C3B6F1	5 months	female	liver	dietary-restricted (DR)	GSM2430567	PE WGBS
SRX2431055	SRR5115683	C3B6F1	5 months	female	liver	dietary-restricted (DR)	GSM2430568	PE WGBS
SRX2431056	SRR5115684	C3B6F1	5 months	female	liver	dietary-restricted (DR)	GSM2430569	PE WGBS
SRX2431057	SRR5115685	C3B6F1	26 months	female	liver	control-fed (AL)	GSM2430570	PE WGBS
SRX2431058	SRR5115686	C3B6F1	26 months	female	liver	control-fed (AL)	GSM2430571	PE WGBS
SRX2431059	SRR5115687	C3B6F1	26 months	female	liver	control-fed (AL)	GSM2430572	PE WGBS
SRX2431060	SRR5115688	C3B6F1	26 months	female	liver	dietary-restricted (DR)	GSM2430573	PE WGBS
SRX2431061	SRR5115689	C3B6F1	26 months	female	liver	dietary-restricted (DR)	GSM2430574	PE WGBS
SRX2431062	SRR5115690	C3B6F1	26 months	female	liver	dietary-restricted (DR)	GSM2430575	PE WGBS
4) Human cell lines
Library	Biological_Replicates	Cell_Type	Age	Gender	GEO accession	Seq_Type
ENCLB098BGY	1	H1-hESC stem cell male embryo	0	Male	GSM2138821	PE WGBS
ENCLB167QQW	2	H1-hESC stem cell male embryo	0	Male	GSM2138820	PE WGBS
ENCLB794YYH	1	B-lymphocyte (GM12878 immortalized cell line)	Adult	Female	GSM2308632	PE WGBS
ENCLB898WPW	2	B-lymphocyte (GM12878 immortalized cell line)	Adult	Female	GSM2308633	PE WGBS
5) Human skins
Experiment	Run	Age	Gender	exposure	GEO accession	tissue	Seq_Type
SRX387050	SRR1042903	25	male	sun protected	GSM1279668	epidermis	PE WGBS
SRX387051	SRR1042904	25	male	sun exposed	GSM1279669	epidermis	PE WGBS
SRX387052	SRR1042905	23	male	sun exposed	GSM1279670	epidermis	PE WGBS
SRX387053	SRR1042906	23	male	sun protected	GSM1279671	epidermis	PE WGBS
SRX387054	SRR1042907	18	male	sun protected	GSM1279672	epidermis	PE WGBS
SRX387055	SRR1042908	18	male	sun exposed	GSM1279673	epidermis	PE WGBS
SRX387056	SRR1042909	75	male	sun protected	GSM1279674	epidermis	PE WGBS
SRX387057	SRR1042910	75	male	sun exposed	GSM1279675	epidermis	PE WGBS
SRX387058	SRR1042911	74	male	sun protected	GSM1279676	epidermis	PE WGBS
SRX387059	SRR1042912	74	male	sun exposed	GSM1279677	epidermis	PE WGBS
SRX387060	SRR1042913	83	male	sun protected	GSM1279678	epidermis	PE WGBS
SRX387061	SRR1042914	83	male	sun exposed	GSM1279679	epidermis	PE WGBS
6) The Canid dataset
Experiment	Library_Name	Organism	Run	SRA_Sample	breed	Gender	Instrument	LibraryLayout	LibrarySelection	SRA_Study	sub_species	tissue
SRX1409119	BASS_1.fastq.gz	Canis lupus familiaris	SRR2889370	SRS1144108	43	female	Illumina HiSeq 2500	SINGLE	Reduced Representation	SRP065319	familiaris	blood
SRX1409158	SSHP_1.fastq.gz	Canis lupus familiaris	SRR2889409	SRS1144069	82	female	Illumina HiSeq 2500	SINGLE	Reduced Representation	SRP065319	familiaris	blood
SRX1409144	PUG_1.fastq.gz	Canis lupus familiaris	SRR2889395	SRS1144083	68	male	Illumina HiSeq 2500	SINGLE	Reduced Representation	SRP065319	familiaris	blood
SRX1409112	AFGH_1.fastq.gz	Canis lupus familiaris	SRR2889363	SRS1144115	36	female	Illumina HiSeq 2500	SINGLE	Reduced Representation	SRP065319	familiaris	blood
SRX1409113	AFGH_2.fastq.gz	Canis lupus familiaris	SRR2889364	SRS1144114	37	female	Illumina HiSeq 2500	SINGLE	Reduced Representation	SRP065319	familiaris	blood
SRX1409114	AFGH_3.fastq.gz	Canis lupus familiaris	SRR2889365	SRS1144113	38	male	Illumina HiSeq 2500	SINGLE	Reduced Representation	SRP065319	familiaris	blood
SRX1409115	AKIT_1.fastq.gz	Canis lupus familiaris	SRR2889366	SRS1144112	39	female	Illumina HiSeq 2500	SINGLE	Reduced Representation	SRP065319	familiaris	blood
SRX1409116	AKIT_2.fastq.gz	Canis lupus familiaris	SRR2889367	SRS1144111	40	male	Illumina HiSeq 2500	SINGLE	Reduced Representation	SRP065319	familiaris	blood
SRX1409117	AKIT_3.fastq.gz	Canis lupus familiaris	SRR2889368	SRS1144110	41	male	Illumina HiSeq 2500	SINGLE	Reduced Representation	SRP065319	familiaris	blood
SRX1409118	AKIT_4.fastq.gz	Canis lupus familiaris	SRR2889369	SRS1144109	42	female	Illumina HiSeq 2500	SINGLE	Reduced Representation	SRP065319	familiaris	blood
SRX1409120	BASS_2.fastq.gz	Canis lupus familiaris	SRR2889371	SRS1144107	44	female	Illumina HiSeq 2500	SINGLE	Reduced Representation	SRP065319	familiaris	blood
SRX1409121	BORZ_1.fastq.gz	Canis lupus familiaris	SRR2913286	SRS1144106	45	female	Illumina HiSeq 2500	SINGLE	Reduced Representation	SRP065319	familiaris	blood
SRX1409122	BORZ_2.fastq.gz	Canis lupus familiaris	SRR2889373	SRS1144105	46	male	Illumina HiSeq 2500	SINGLE	Reduced Representation	SRP065319	familiaris	blood
SRX1409123	BOX_1.fastq.gz	Canis lupus familiaris	SRR2913288	SRS1144104	47	female	Illumina HiSeq 2500	SINGLE	Reduced Representation	SRP065319	familiaris	blood
SRX1409124	BOX_2.fastq.gz	Canis lupus familiaris	SRR2889375	SRS1144103	48	male	Illumina HiSeq 2500	SINGLE	Reduced Representation	SRP065319	familiaris	blood
SRX1409125	BOX_3.fastq.gz	Canis lupus familiaris	SRR2889376	SRS1144102	49	male	Illumina HiSeq 2500	SINGLE	Reduced Representation	SRP065319	familiaris	blood
SRX1409126	BOX_4.fastq.gz	Canis lupus familiaris	SRR2889377	SRS1144101	50	female	Illumina HiSeq 2500	SINGLE	Reduced Representation	SRP065319	familiaris	blood
SRX1409127	BSJI_1.fastq.gz	Canis lupus familiaris	SRR2889378	SRS1144100	51	male	Illumina HiSeq 2500	SINGLE	Reduced Representation	SRP065319	familiaris	blood
SRX1409128	BSJI_2.fastq.gz	Canis lupus familiaris	SRR2889379	SRS1144099	52	male	Illumina HiSeq 2500	SINGLE	Reduced Representation	SRP065319	familiaris	blood
SRX1409129	BSJI_3.fastq.gz	Canis lupus familiaris	SRR2889380	SRS1144098	53	female	Illumina HiSeq 2500	SINGLE	Reduced Representation	SRP065319	familiaris	blood
SRX1409132	ESSP1.fastq.gz	Canis lupus familiaris	SRR2889383	SRS1144095	56	female	Illumina HiSeq 2500	SINGLE	Reduced Representation	SRP065319	familiaris	blood
SRX1409133	HUSK_1.fastq.gz	Canis lupus familiaris	SRR2889384	SRS1144094	57	male	Illumina HiSeq 2500	SINGLE	Reduced Representation	SRP065319	familiaris	blood
SRX1409134	LAB_1.fastq.gz	Canis lupus familiaris	SRR2889385	SRS1144093	58	male	Illumina HiSeq 2500	SINGLE	Reduced Representation	SRP065319	familiaris	blood
SRX1409135	LAB_2.fastq.gz	Canis lupus familiaris	SRR2889386	SRS1144092	59	male	Illumina HiSeq 2500	SINGLE	Reduced Representation	SRP065319	familiaris	blood
SRX1409136	LAB_3.fastq.gz	Canis lupus familiaris	SRR2889387	SRS1144091	60	female	Illumina HiSeq 2500	SINGLE	Reduced Representation	SRP065319	familiaris	blood
SRX1409137	PEKE_1.fastq.gz	Canis lupus familiaris	SRR2889388	SRS1144090	61	male	Illumina HiSeq 2500	SINGLE	Reduced Representation	SRP065319	familiaris	blood
SRX1409138	PEKE_2.fastq.gz	Canis lupus familiaris	SRR2889389	SRS1144089	62	female	Illumina HiSeq 2500	SINGLE	Reduced Representation	SRP065319	familiaris	blood
SRX1409139	PEKE_3.fastq.gz	Canis lupus familiaris	SRR2889390	SRS1144088	63	female	Illumina HiSeq 2500	SINGLE	Reduced Representation	SRP065319	familiaris	blood
SRX1409140	PEKE_4.fastq.gz	Canis lupus familiaris	SRR2889391	SRS1144087	64	male	Illumina HiSeq 2500	SINGLE	Reduced Representation	SRP065319	familiaris	blood
SRX1409141	POM_1.fastq.gz	Canis lupus familiaris	SRR2889392	SRS1144086	65	female	Illumina HiSeq 2500	SINGLE	Reduced Representation	SRP065319	familiaris	blood
SRX1409142	PTWD_1.fastq.gz	Canis lupus familiaris	SRR2889393	SRS1144085	66	female	Illumina HiSeq 2500	SINGLE	Reduced Representation	SRP065319	familiaris	blood
SRX1409143	PTWD_2.fastq.gz	Canis lupus familiaris	SRR2889394	SRS1144084	67	female	Illumina HiSeq 2500	SINGLE	Reduced Representation	SRP065319	familiaris	blood
SRX1409145	PUG_2.fastq.gz	Canis lupus familiaris	SRR2889396	SRS1144082	69	male	Illumina HiSeq 2500	SINGLE	Reduced Representation	SRP065319	familiaris	blood
SRX1409146	PUG_3.fastq.gz	Canis lupus familiaris	SRR2913260	SRS1144081	70	female	Illumina HiSeq 2500	SINGLE	Reduced Representation	SRP065319	familiaris	blood
SRX1409147	PUG_4.fastq.gz	Canis lupus familiaris	SRR2889398	SRS1144080	71	female	Illumina HiSeq 2500	SINGLE	Reduced Representation	SRP065319	familiaris	blood
SRX1409148	SAMO_1.fastq.gz	Canis lupus familiaris	SRR2889399	SRS1144079	72	female	Illumina HiSeq 2500	SINGLE	Reduced Representation	SRP065319	familiaris	blood
SRX1409149	SAMO_2.fastq.gz	Canis lupus familiaris	SRR2889400	SRS1144078	73	male	Illumina HiSeq 2500	SINGLE	Reduced Representation	SRP065319	familiaris	blood
SRX1409150	SAMO_3.fastq.gz	Canis lupus familiaris	SRR2889401	SRS1144077	74	male	Illumina HiSeq 2500	SINGLE	Reduced Representation	SRP065319	familiaris	blood
SRX1409151	SCOT_1.fastq.gz	Canis lupus familiaris	SRR2913252	SRS1144076	75	female	Illumina HiSeq 2500	SINGLE	Reduced Representation	SRP065319	familiaris	blood
SRX1409152	SHAR_1.fastq.gz	Canis lupus familiaris	SRR2889403	SRS1144075	76	female	Illumina HiSeq 2500	SINGLE	Reduced Representation	SRP065319	familiaris	blood
SRX1409153	SHAR_2.fastq.gz	Canis lupus familiaris	SRR2889404	SRS1144074	77	male	Illumina HiSeq 2500	SINGLE	Reduced Representation	SRP065319	familiaris	blood
SRX1409154	SHAR_3.fastq.gz	Canis lupus familiaris	SRR2889405	SRS1144073	78	female	Illumina HiSeq 2500	SINGLE	Reduced Representation	SRP065319	familiaris	blood
SRX1409155	SHAR_4.fastq.gz	Canis lupus familiaris	SRR2889406	SRS1144072	79	male	Illumina HiSeq 2500	SINGLE	Reduced Representation	SRP065319	familiaris	blood
SRX1409156	SPOO_1.fastq.gz	Canis lupus familiaris	SRR2889407	SRS1144071	80	male	Illumina HiSeq 2500	SINGLE	Reduced Representation	SRP065319	familiaris	blood
SRX1409157	SPOO_2.fastq.gz	Canis lupus familiaris	SRR2889408	SRS1144070	81	female	Illumina HiSeq 2500	SINGLE	Reduced Representation	SRP065319	familiaris	blood
SRX1409105	10F.fastq.gz	Canis lupus	SRR2889356	SRS1144122	29	female	Illumina HiSeq 2500	SINGLE	Reduced Representation	SRP065319		blood
SRX1409086	10M.fastq.gz	Canis lupus	SRR2889337	SRS1144141	10	male	Illumina HiSeq 2500	SINGLE	Reduced Representation	SRP065319		blood
SRX1409106	11F.fastq.gz	Canis lupus	SRR2889357	SRS1144121	30	female	Illumina HiSeq 2500	SINGLE	Reduced Representation	SRP065319		blood
SRX1409087	11M.fastq.gz	Canis lupus	SRR2889338	SRS1144140	11	male	Illumina HiSeq 2500	SINGLE	Reduced Representation	SRP065319		blood
SRX1409107	12F.fastq.gz	Canis lupus	SRR2889358	SRS1144120	31	female	Illumina HiSeq 2500	SINGLE	Reduced Representation	SRP065319		blood
SRX1409088	12M.fastq.gz	Canis lupus	SRR2889339	SRS1144139	12	male	Illumina HiSeq 2500	SINGLE	Reduced Representation	SRP065319		blood
SRX1409108	13F.fastq.gz	Canis lupus	SRR2889359	SRS1144119	32	female	Illumina HiSeq 2500	SINGLE	Reduced Representation	SRP065319		blood
SRX1426896	13M.fastq.gz	Canis lupus	SRR2912741	SRS1144138	13	male	Illumina HiSeq 2500	SINGLE	Reduced Representation	SRP065319		blood
SRX1409109	14F.fastq.gz	Canis lupus	SRR2889360	SRS1144118	33	female	Illumina HiSeq 2500	SINGLE	Reduced Representation	SRP065319		blood
SRX1409090	14M.fastq.gz	Canis lupus	SRR2889341	SRS1144137	14	male	Illumina HiSeq 2500	SINGLE	Reduced Representation	SRP065319		blood
SRX1409110	15F.fastq.gz	Canis lupus	SRR2889361	SRS1144117	34	female	Illumina HiSeq 2500	SINGLE	Reduced Representation	SRP065319		blood
SRX1409091	15M.fastq.gz	Canis lupus	SRR2889342	SRS1144136	15	male	Illumina HiSeq 2500	SINGLE	Reduced Representation	SRP065319		blood
SRX1409111	16F.fastq.gz	Canis lupus	SRR2889362	SRS1144116	35	female	Illumina HiSeq 2500	SINGLE	Reduced Representation	SRP065319		blood
SRX1409092	16M.fastq.gz	Canis lupus	SRR2889343	SRS1144135	16	male	Illumina HiSeq 2500	SINGLE	Reduced Representation	SRP065319		blood
SRX1409093	17M.fastq.gz	Canis lupus	SRR2889344	SRS1144134	17	male	Illumina HiSeq 2500	SINGLE	Reduced Representation	SRP065319		blood
SRX1409094	18M.fastq.gz	Canis lupus	SRR2889345	SRS1144133	18	male	Illumina HiSeq 2500	SINGLE	Reduced Representation	SRP065319		blood
SRX1409095	19M.fastq.gz	Canis lupus	SRR2889346	SRS1144132	19	male	Illumina HiSeq 2500	SINGLE	Reduced Representation	SRP065319		blood
SRX1409096	1F.fastq.gz	Canis lupus	SRR2913287	SRS1144131	20	female	Illumina HiSeq 2500	SINGLE	Reduced Representation	SRP065319		blood
SRX1409077	1M.fastq.gz	Canis lupus	SRR2889328	SRS1144150	1	male	Illumina HiSeq 2500	SINGLE	Reduced Representation	SRP065319		blood
SRX1409097	2F.fastq.gz	Canis lupus	SRR2889348	SRS1144130	21	female	Illumina HiSeq 2500	SINGLE	Reduced Representation	SRP065319		blood
SRX1409078	2M.fastq.gz	Canis lupus	SRR2889329	SRS1144149	2	male	Illumina HiSeq 2500	SINGLE	Reduced Representation	SRP065319		blood
SRX1409098	3F.fastq.gz	Canis lupus	SRR2889349	SRS1144129	22	female	Illumina HiSeq 2500	SINGLE	Reduced Representation	SRP065319		blood
SRX1409079	3M.fastq.gz	Canis lupus	SRR2889330	SRS1144148	3	male	Illumina HiSeq 2500	SINGLE	Reduced Representation	SRP065319		blood
SRX1409099	4F.fastq.gz	Canis lupus	SRR2889350	SRS1144128	23	female	Illumina HiSeq 2500	SINGLE	Reduced Representation	SRP065319		blood
SRX1409080	4M.fastq.gz	Canis lupus	SRR2889331	SRS1144147	4	male	Illumina HiSeq 2500	SINGLE	Reduced Representation	SRP065319		blood
SRX1409100	5F.fastq.gz	Canis lupus	SRR2889351	SRS1144127	24	female	Illumina HiSeq 2500	SINGLE	Reduced Representation	SRP065319		blood
SRX1409081	5M.fastq.gz	Canis lupus	SRR2889332	SRS1144145	5	male	Illumina HiSeq 2500	SINGLE	Reduced Representation	SRP065319		blood
SRX1409101	6F.fastq.gz	Canis lupus	SRR2889352	SRS1144126	25	female	Illumina HiSeq 2500	SINGLE	Reduced Representation	SRP065319		blood
SRX1409082	6M.fastq.gz	Canis lupus	SRR2889333	SRS1144146	6	male	Illumina HiSeq 2500	SINGLE	Reduced Representation	SRP065319		blood
SRX1409102	7F.fastq.gz	Canis lupus	SRR2889353	SRS1144125	26	female	Illumina HiSeq 2500	SINGLE	Reduced Representation	SRP065319		blood
SRX1409083	7M.fastq.gz	Canis lupus	SRR2889334	SRS1144144	7	male	Illumina HiSeq 2500	SINGLE	Reduced Representation	SRP065319		blood
SRX1409103	8F.fastq.gz	Canis lupus	SRR2889354	SRS1144124	27	female	Illumina HiSeq 2500	SINGLE	Reduced Representation	SRP065319		blood
SRX1409084	8M.fastq.gz	Canis lupus	SRR2889335	SRS1144143	8	male	Illumina HiSeq 2500	SINGLE	Reduced Representation	SRP065319		blood
SRX1409104	9F.fastq.gz	Canis lupus	SRR2889355	SRS1144123	28	female	Illumina HiSeq 2500	SINGLE	Reduced Representation	SRP065319		blood
SRX1409085	9M.fastq.gz	Canis lupus	SRR2889336	SRS1144142	9	male	Illumina HiSeq 2500	SINGLE	Reduced Representation	SRP065319		blood
Note:
The Petkovich dataset: Petkovich, D. A., D. I. Podolskiy, A. V. Lobanov, S. G. Lee, R. A. Miller et al., 2017 Using DNA Methylation Profiling to Evaluate Biological Age and Longevity Interventions. Cell Metab 25: 954-960 e956.
The Stubbs dataset: Stubbs, T. M., M. J. Bonder, A. K. Stark, F. Krueger, B. I. A. C. Team et al., 2017 Multi-tissue DNA methylation age predictor in mouse. Genome Biol 18: 68.
The Hahn dataset: Hahn, O., S. Gronke, T. M. Stubbs, G. Ficz, O. Hendrich et al., 2017 Dietary restriction protects from age-associated DNA methylation and induces epigenetic reprogramming of lipid metabolism. Genome Biol 18: 56.
The ENCODE url of human cell lines: https://www.encodeproject.org/
The Skin dataset: Vandiver AR, Irizarry RA, Hansen KD, Garza LA, Runarsson A, Li X, Chien AL, Wang TS, Leung SG, Kang S, Feinberg AP: Age and sun exposure-related widespread genomic blocks of hypomethylation in nonmalignant skin. Genome Biol 2015, 16:80.
The Canid dataset: Janowitz Koch, I., M. M. Clark, M. J. Thompson, K. A. Deere-Machemer, J. Wang et al., 2016 The concerted impact of domestication and transposon insertions on methylation patterns between dogs and grey wolves. Mol Ecol 25: 1838-1855.
