# Supplementary material for: Ribosomal DNA harbors an evolutionarily conserved clock of biological aging
Source: HighWire-hosted journal article supplement (doi:10.1101/gr.241745.118), 2019-02-14
Supplement: Supplemental_Table_S2.xlsx [file Supplemental_Table_S2.xlsx]

## Sheet: Sheet1
Supplemental Table S2. The 72 CpGs and the coefficients of the best fitted model
	Weight
(Intercept)	-2.22392
BK000964.3,-375,+,CG,CGA	-1.37064
BK000964.3,-179,+,CG,CGG	-0.255988
BK000964.3,660,+,CG,CGA	-0.630935
BK000964.3,685,+,CG,CGG	-0.999987
BK000964.3,793,+,CG,CGG	0.269125
BK000964.3,1022,+,CG,CGT	-0.198202
BK000964.3,1159,+,CG,CGT	-2.02239
BK000964.3,1522,+,CG,CGT	1.92969
BK000964.3,1527,+,CG,CGC	2.76645
BK000964.3,2242,+,CG,CGT	-0.811647
BK000964.3,2423,+,CG,CGC	-0.865009
BK000964.3,2427,+,CG,CGA	-1.16167
BK000964.3,2463,+,CG,CGG	-0.873801
BK000964.3,2479,+,CG,CGG	-1.06339
BK000964.3,2653,+,CG,CGG	0.334483
BK000964.3,2672,+,CG,CGA	1.03291
BK000964.3,3431,+,CG,CGC	0.802318
BK000964.3,3688,+,CG,CGG	-2.53205
BK000964.3,3852,+,CG,CGC	0.629454
BK000964.3,3875,+,CG,CGA	0.834525
BK000964.3,4390,+,CG,CGT	-0.553907
BK000964.3,4885,+,CG,CGC	0.278965
BK000964.3,4939,+,CG,CGG	0.611376
BK000964.3,4959,+,CG,CGC	0.564132
BK000964.3,5099,+,CG,CGA	5.64206
BK000964.3,5117,+,CG,CGT	-2.75056
BK000964.3,5318,+,CG,CGA	-1.50093
BK000964.3,5572,+,CG,CGG	0.919387
BK000964.3,5642,+,CG,CGA	0.0871478
BK000964.3,5763,+,CG,CGG	0.0259789
BK000964.3,5900,+,CG,CGG	1.60866
BK000964.3,5910,+,CG,CGC	0.23437
BK000964.3,6228,+,CG,CGC	1.45544
BK000964.3,6318,+,CG,CGC	2.14409
BK000964.3,6374,+,CG,CGC	-0.233465
BK000964.3,6833,+,CG,CGT	-0.685929
BK000964.3,6836,+,CG,CGT	-0.680309
BK000964.3,7044,+,CG,CGC	3.87154
BK000964.3,7233,+,CG,CGT	-0.192542
BK000964.3,7245,+,CG,CGC	-0.891603
BK000964.3,7290,+,CG,CGC	0.0999691
BK000964.3,7546,+,CG,CGG	0.850517
BK000964.3,7614,+,CG,CGG	1.06833
BK000964.3,7802,+,CG,CGG	3.3519
BK000964.3,7833,+,CG,CGA	-2.60127
BK000964.3,8003,+,CG,CGG	-1.48504
BK000964.3,8568,+,CG,CGC	-2.19086
BK000964.3,8577,+,CG,CGC	-2.0971
BK000964.3,8770,+,CG,CGG	1.20614
BK000964.3,8787,+,CG,CGG	-0.530761
BK000964.3,9142,+,CG,CGC	-1.8454
BK000964.3,9444,+,CG,CGC	-2.70168
BK000964.3,9656,+,CG,CGG	0.907285
BK000964.3,10014,+,CG,CGG	-0.523624
BK000964.3,10560,+,CG,CGT	0.815196
BK000964.3,10595,+,CG,CGG	3.27383
BK000964.3,10796,+,CG,CGA	-0.0845684
BK000964.3,10811,+,CG,CGC	-0.594179
BK000964.3,11366,+,CG,CGG	0.16176
BK000964.3,11396,+,CG,CGG	1.53643
BK000964.3,11787,+,CG,CGG	0.216309
BK000964.3,11911,+,CG,CGC	0.0337686
BK000964.3,12542,+,CG,CGG	0.211794
BK000964.3,12581,+,CG,CGT	0.193811
BK000964.3,12589,+,CG,CGG	1.21624
BK000964.3,12650,+,CG,CGT	0.0029722
BK000964.3,12693,+,CG,CGC	0.219089
BK000964.3,12702,+,CG,CGT	1.11859
BK000964.3,12854,+,CG,CGT	-0.36366
BK000964.3,13219,+,CG,CGG	-2.13074
BK000964.3,13250,+,CG,CGG	0.0719895
BK000964.3,13321,+,CG,CGC	0.27367
