# Supplementary material for: Ribosomal DNA harbors an evolutionarily conserved clock of biological aging
Source: HighWire-hosted journal article supplement (doi:10.1101/gr.241745.118), 2019-02-14
Supplement: Supplemental_Table_S3.xlsx [file Supplemental_Table_S3.xlsx]

## Sheet: Sheet1
Supplemental Table S3. The impact of CpGs with low ρage or low weight on the performance of the best fitted model.
a) The correlation between predicted value (biological age) and chronological age for a series of ρage cutoffs. Shown are the correlation for the full model with all CpGs included and for models in which CpGs are removed based on their correlation with age. For instance, there are 8 CpGs with ρage greater than 0.6. A model that excludes all other CpGs but those 8 ones yields a correlation between…
rage (age-association) Cutoff	Number of included CpGs	Spearman’s correlation coefficients (predicted age and chronological age)
-1 (no cutoff)	72	0.98
>0	68	0.92
>0.1	62	0.86
>0.2	51	0.8
>0.3	40	0.7
>0.4	26	0.7
>0.5	16	0.72
>0.6	8	0.74
b) The correlation between predicted value and chronological age for a series of weight Cutoffs. Shown are the correlation for the full model with all CpGs included and for models in which CpGs are removed based on their weight in the model. For instance, a model that excludes all CpGs but those 18 with weights coefficients greater than 0.83852 yields a correlation between predicted and chronolog…
Weight Cutoff (quantile)	Number of included CpGs	Spearman’s correlation coefficients (predicted value and chronological age)
not cutoff (0%)	72	0.98
-0.82499 (25%)	54	0.67
0.07957 (50%)	36	0.63
0.83852 (75%)	18	0.65
